# Supplementary material for: Dissolution-After-Precipitation (DAP): a simple microfluidic approach for studying carbonate rock dissolution and multiphase reactive transport mechanisms
Source: Royal Society of Chemistry journal article supplement (doi:10.1039/d2lc00426g), 2022-01-01
Supplement: d2lc00426g4.pdf [file d2lc00426g4.pdf]

1 **Supplemental Materials for:**

2 **Dissolution-After-Precipitation (DAP): A Simple Microfluidic Approach for Studying**  
3 **Carbonate Rock Dissolution and Multiphase Reactive Transport Mechanisms**

4  
5 Jianping Xu <sup>1,2</sup> and Matthew T. Balhoff <sup>1,2</sup>

6 <sup>1</sup> *Hildebrand Department of Petroleum and Geosystems Engineering, The University of Texas at Austin,*  
7 *Austin, Texas 78712, USA*

8 <sup>2</sup> *Center for Subsurface Energy and the Environment, The University of Texas at Austin, Austin, Texas 78712,*  
9 *USA*

10  
11  
12 **1. Measurement of diffusive mixing band width**

13 Images from the color mixing experiments can be analyzed to obtain width of diffusive mixing band.

14 An Otsu thresholding method is used to binarize the image in ImageJ, and the binarized version could  
15 be used to measure band width. The binarized images of Fig. 4 are shown in Fig. S1.

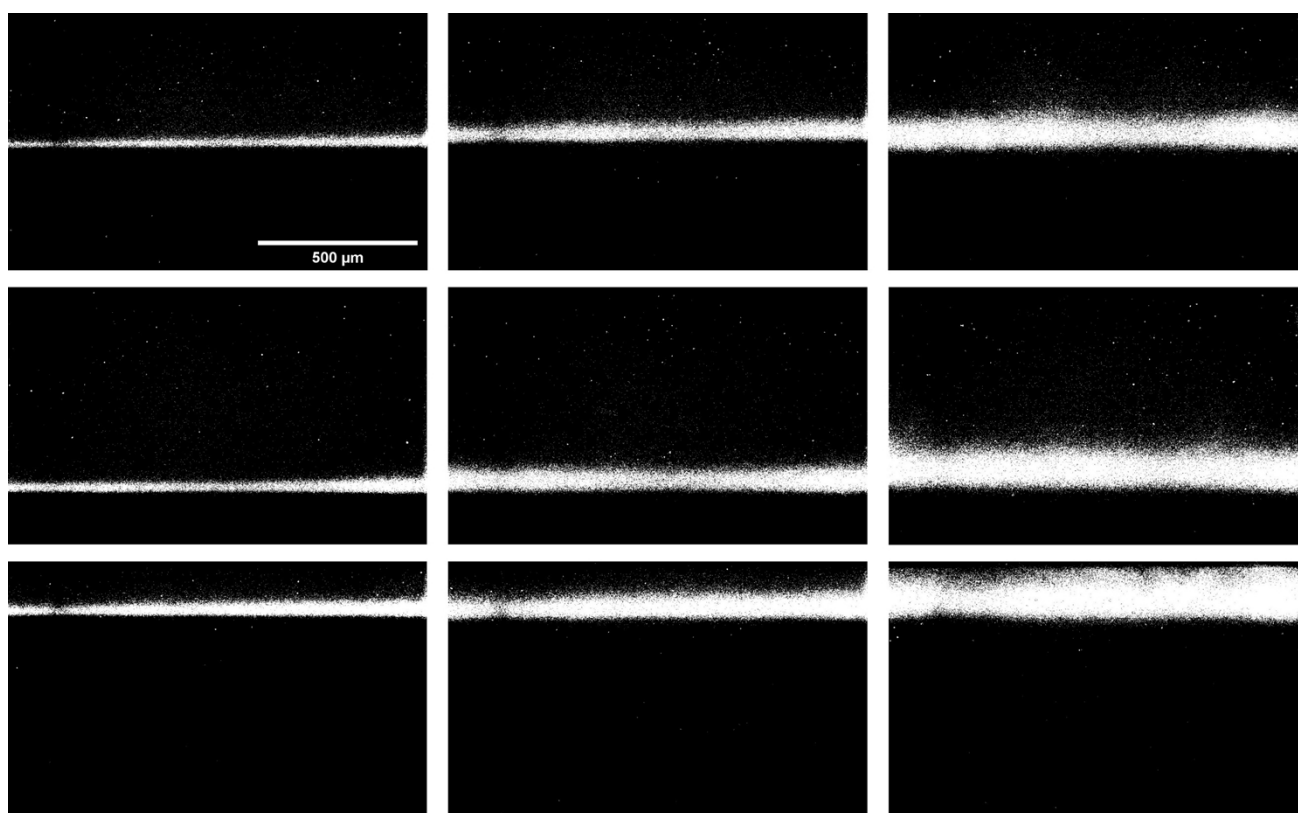

18 **Figure S1.** Binarized version of Fig. 4.

19

20 As shown in Fig. S1, there is non-negligible noise in the binarized images. To measure effective width  
21 of the band, we first measure the total area of the white pixel region, then divide it by the length of the  
22 image. This yields the width of a rectangle that has the same area as the white band in Fig. S1. The  
23 results are shown in Tab. S1.

24

25

**Table S1.** Measurements of effective width of the diffusive mixing bands in Fig. S1

| Flow rate pair ( $\mu\text{L/h}$ , $\mu\text{L/h}$ ) | Location   | Effective band width ( $\mu\text{m}$ ) |
|------------------------------------------------------|------------|----------------------------------------|
| (20, 20)                                             | Upstream   | 24                                     |
| (20, 20)                                             | Midstream  | 49                                     |
| (20, 20)                                             | Downstream | 98                                     |
| (20, 5)                                              | Upstream   | 31                                     |
| (20, 5)                                              | Midstream  | 64                                     |
| (20, 5)                                              | Downstream | 139                                    |
| (5, 20)                                              | Upstream   | 42                                     |
| (5, 20)                                              | Midstream  | 74                                     |
| (5, 20)                                              | Downstream | 135                                    |

26

27

## 28 **2. Precipitation profile along the channel**

29 In this section we present one experimental example of an increasingly more homogeneous  
30 precipitation profile from upstream to downstream of the channel. The snapshots from the experiment  
31 are shown in Fig. S2.

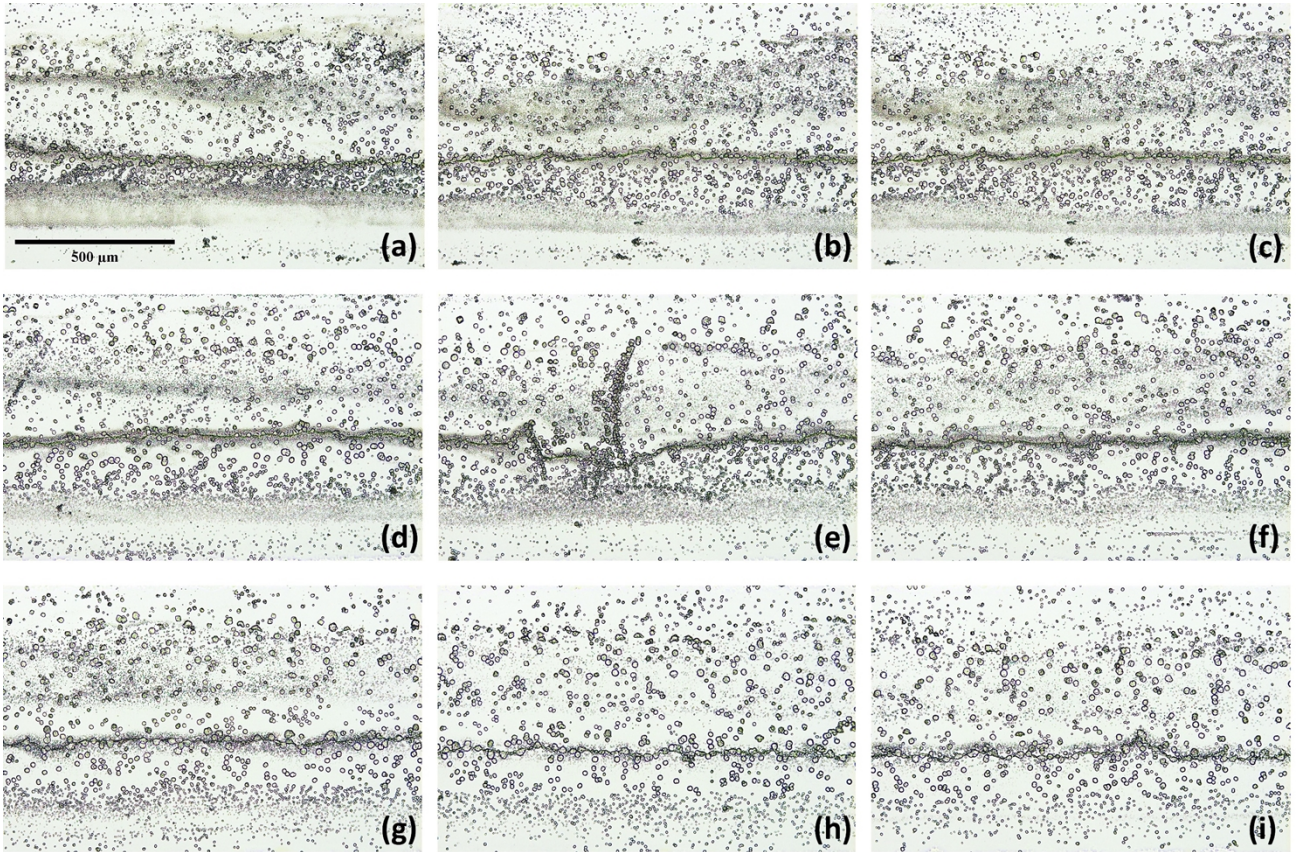

32  
 33 **Figure S2.** Experimental snapshots of the increasingly more homogeneous precipitation profile from upstream to  
 34 downstream. The distance of the observation window from the junction increases from (a) to (i).

35  
 36 From the figure, we see that at the upstream, there are several stripes of high density of grains  
 37 aggregation, signaling the historical presence of multiple diffusive mixing bands. Consequently, the  
 38 structure of the porous medium is heterogeneous across the transverse direction. At the last panel (i),  
 39 there is only one thin line of grain aggregation, and the overall distribution of grains is mostly uniform,  
 40 although there is still difference between individual crystal grains' size.

41  
 42 **3. Arithmetic mean and weighted mean**

43 In the paper we have used arithmetic mean ( $\bar{S}^H$ ) of  $S_i^H$  to calculate the characteristic length scale  $d$ .  
 44 One alternative is the weighted mean, which could be expressed as

$$\bar{S}^H|_w = \sum_{i=1}^N f(S_i^H) S_i^H$$

45  
 46 where  $f(S_i^H)$  is the probability to have an area of  $S_i^H$ , and  $f(\cdot)$  is the probability density function of

47 the area. The histogram of the area, such as shown in Fig. 6, is a natural representation of  $f(\cdot)$  when  
 48 normalized. We constructed  $f(\cdot)$  from  $S_i^H$ 's data using a logarithmic binning method<sup>1</sup>. We chose  
 49 logarithmic binning over binning in linear scale because the sizes of areas cover several orders of  
 50 magnitude, which will introduce massive noise in the latter. The computed probability density  
 51 functions for initial state of Exp 1-7 are shown in Fig. S3.

52

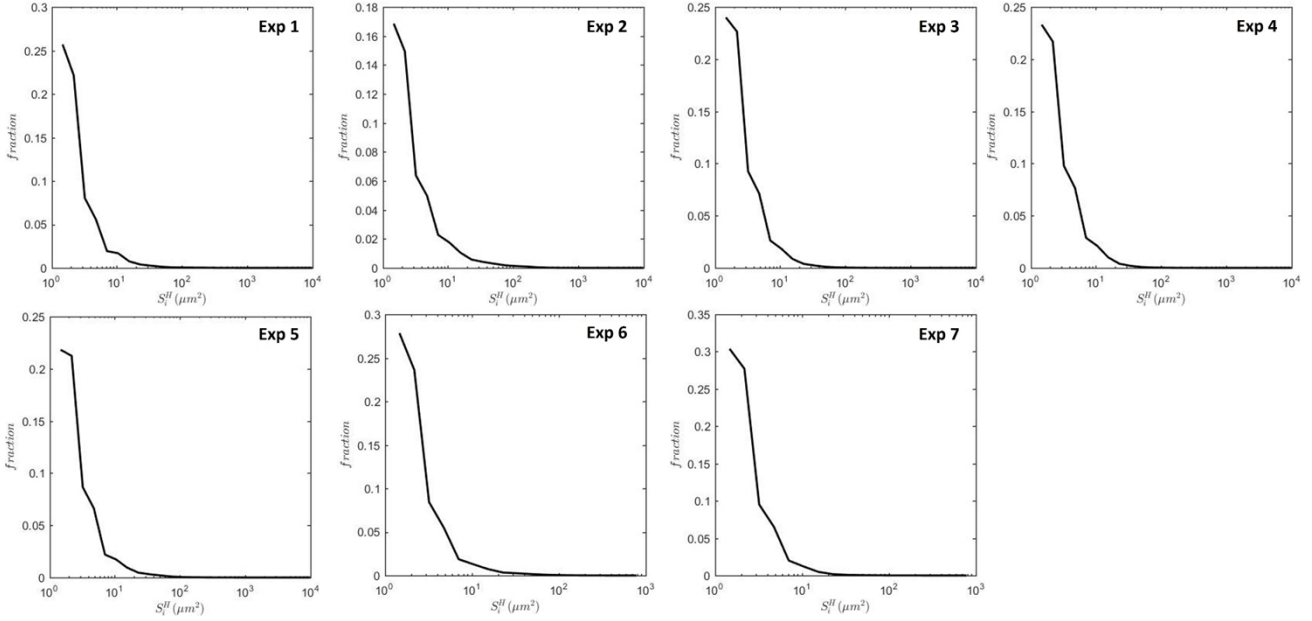

53

54 **Figure S3.** The probability density functions of particles sizes in Exp 1-7.

55

56 Using the probability density functions, we can calculate  $\bar{S}^H|_w$  and compare the values to the arithmetic  
 57 means.

58

59 The normalized histograms assign weights based on numbers/populations. The other way of assigning  
 60 weights is by particle's areas. The following equation calculates weighted mean based on areas:

$$\bar{S}^H|_w = \frac{\sum_{i=1}^N S_i^H S_i^H}{\sum_{i=1}^N S_i^H}$$

61

$$f(S_i^H) = \frac{S_i^H}{\sum_{i=1}^N S_i^H}$$

62 Under this definition, . We calculate the weighted means also based on this definition.

63 The results are summarized in Tab. S2.

64

65 Table S2. Comparison between characteristic horizontal areas of grains using arithmetic mean and weighted mean

| Experiment #<br>Exp () | $\bar{S}^H$ ( $\mu\text{m}^2$ ),<br>arithmetic<br>mean | $\bar{S}^H _w$ ( $\mu\text{m}^2$ ),<br>weighted<br>numbers | $\bar{S}^H _w$ ( $\mu\text{m}^2$ ),<br>by<br>weighted by<br>areas |
|------------------------|--------------------------------------------------------|------------------------------------------------------------|-------------------------------------------------------------------|
| 1                      | 26.70                                                  | 2.29                                                       | 5469                                                              |
| 2                      | 52.84                                                  | 2.56                                                       | 13619                                                             |
| 3                      | 17.05                                                  | 2.34                                                       | 11487                                                             |
| 4                      | 10.78                                                  | 2.36                                                       | 2164                                                              |
| 5                      | 44.36                                                  | 2.41                                                       | 69034                                                             |
| 6                      | 10.10                                                  | 2.22                                                       | 118                                                               |
| 7                      | 4.96                                                   | 1.14                                                       | 95                                                                |

66

67 Data in Tab. S2 show that using weights based on particle numbers and particle areas have produced  
68 starkly different results. As elaborated in section 2.4 of the paper, the particle statistics is heavily biased  
69 such that large numbers of small particles only account for small fraction of total areas in the system,  
70 while small numbers of larger particles possess large fraction of total areas. Therefore, when weighted  
71 by numbers, the mean would be dominated by the small particles. When weighted by areas, the mean  
72 would be dominated by few extremely large particles due to the square operation in the numerator.  
73 The arithmetic means situate between these two extremes and seem to better describe a combined  
74 effect of small and large particles. Therefore, we used the arithmetic mean in the paper.

75

#### 76 4. Smallest particles in the histogram

77 In Fig. 6 of the paper, the smallest particles on the left end of the histogram are about  $1 \mu\text{m}^2$ , which is  
78 close to the resolution of the image ( $0.8892 \mu\text{m}^2/\text{pixel area}$ , or  $0.943 \mu\text{m}/\text{pixel length}$ ). In this section  
79 we show a close-up comparison of these smallest particles in the raw image and binarized image from  
80 Fig. 6. The comparison is shown in Fig. S4.

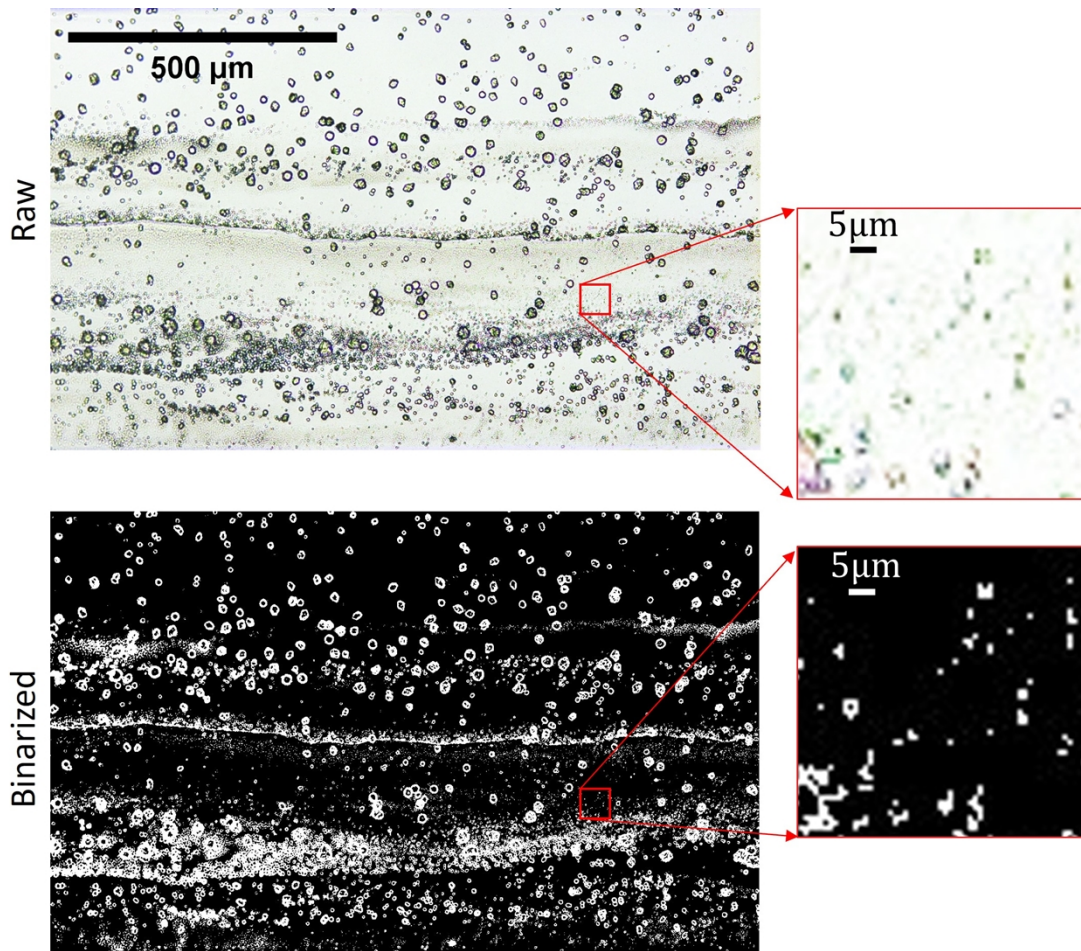

81

82 **Figure S4.** Comparison between smallest particles in the raw image and binarized image.

83

84 The zoomed in window contains several particles that are close to the image resolution. We see that  
85 the binarized image matches well with the raw image in terms of identifying these smallest particles.

86 We conclude that these smallest particles are not noises in image analysis.

87

## 88 **5. Wettability characterization**

89 The wettability of the solid grains is characterized using contact angle between acid and the grain. We  
90 collected 15 instances of acid-grain contacts in Exp 6, from which 24 measurements of contact angle  
91 could be made. These instances are presented in Fig. S5.

92

93

94

95

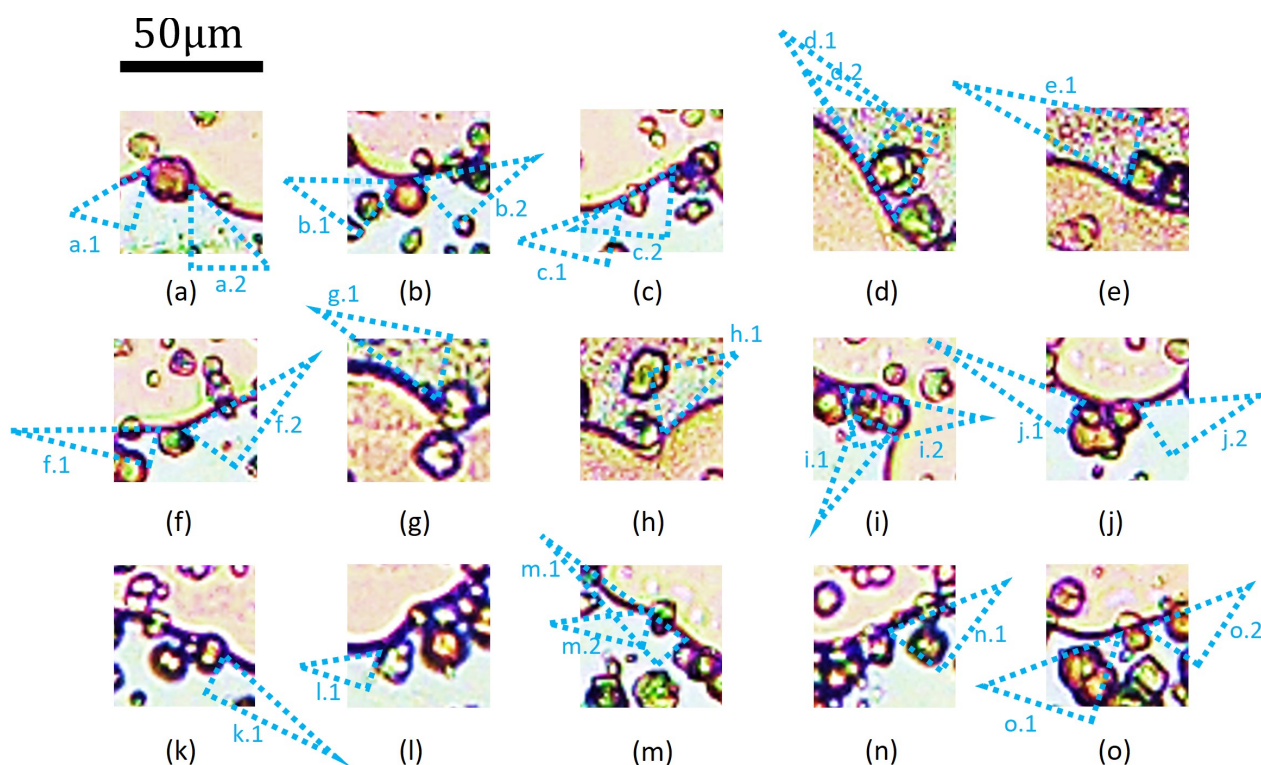

96  
 97 **Figure S5.** The measurements of acid contact angles. The angle is calculated from inverse tangent of the ratio of the two  
 98 right-angle sides.

99

100 The contact angle is calculated from the inverse tangent of the ratio of the two right-angle sides of the  
 101 measuring triangle. Results of the acid contact angles are summarized in Tab. S3.

102

103

Table S3. Results of acid contact angle measurements

| Angle # | Acid contact angle (°) |
|---------|------------------------|
| a.1     | 45.0                   |
| a.2     | 42.5                   |
| b.1     | 55.3                   |
| b.2     | 59.2                   |
| c.1     | 55.3                   |
| c.2     | 53.8                   |
| d.1     | 68.6                   |
| d.2     | 59.2                   |
| e.1     | 71.6                   |
| f.1     | 75.3                   |
| f.2     | 65.3                   |
| g.1     | 64.7                   |
| h.1     | 54.8                   |
| i.1     | 70.8                   |
| i.2     | 65.0                   |
| j.1     | 77.0                   |

|     |      |
|-----|------|
| j.2 | 60.5 |
| k.1 | 73.5 |
| l.1 | 62.9 |
| m.1 | 77.8 |
| m.2 | 68.7 |
| n.1 | 58.3 |
| o.1 | 51.0 |
| o.2 | 54.6 |

---

104

105 Data showing in Tab. S3 indicate that the wettability of the medium is not uniformly distributed in  
 106 space. In different regions of the porous medium, the contact angle varies. The data range from 45.0°  
 107 to 77.8°, with an average contact angle of 62.1°. Thus the medium is water-wet, but not strongly water-  
 108 wet.

109

## 110 6. Calculations of acid resident times

111 The resident time of acid in the domain of interest is calculated by the interstitial velocities of acid ( $v$ )  
 112 and the length of the domain ( $l_{win}$ , defined in the paper) as follows,

$$113 \quad \tau = \frac{l_{win}}{v}$$

114 where  $v = \frac{q}{A_c \phi}$  is the interstitial velocity.

115 The results for resident times of Exp 1-7 are summarized in Tab. S4.

116

117

Table S4. Resident times of acid

| Experiment #<br>Exp () | Resident time<br>(s) |
|------------------------|----------------------|
| 1                      | 0.99                 |
| 2                      | 270.71               |
| 3                      | 1.78                 |
| 4                      | 0.53                 |
| 5                      | 0.14                 |
| 6                      | 12.81                |
| 7                      | 19.02                |

118

119 Longer resident time corresponds to slower acid delivery. When the acid spends longer time in the



120 domain of interest, it also means fresh acid take longer time to arrive. In such a way, the dissolution  
 121 could be slow since local acidity can be exhausted without a timely replenishment. For example, in the  
 122 compact dissolution, the resident time is the highest, and it is also the slowest one.

123

124 **7. Characteristic length of pore spaces**

125 In Eq. (4) we have used the characteristic grain size  $d$  to construct the Peclet number. One may also  
 126 use the characteristic length of the pore spaces. Here we denote this length as  $D$ .

127

128 To generate the characteristic length of the pore spaces, a similar workflow to Fig. 6 would work.  
 129 Instead, we need to reverse the background of the image such that particles becomes “pores” and pores  
 130 spaces becomes “particles”. After this, the Particle Analysis procedure could give the mean area of  
 131 pore “particles”, with which we can calculate  $D$ . Here, using Exp 5 as example.

132

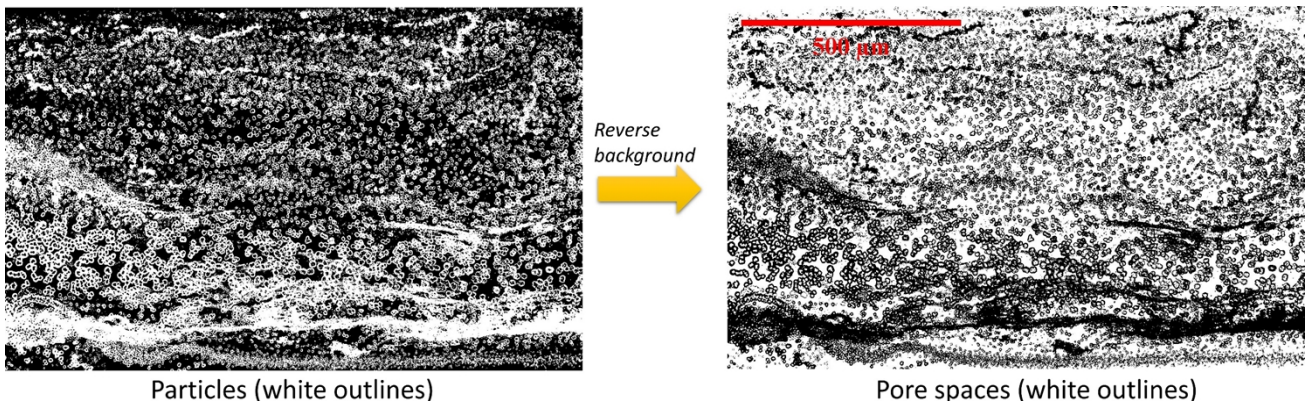

133

134

135

136 After reversing the background, pore spaces become the “particles” and its statistics can be computed.  
 137 After obtaining the mean areas, we can calculate the length by square root of the data. Results of  $D$   
 138 with its comparison to  $d$  are shown in Tab. S5.

139

140

**Table S5.** Comparison of characteristic lengths of solid grains and pore spaces

| Experiment #<br>Exp () | Grain<br>length<br>( $\mu\text{m}$ ) | Pore<br>space<br>length<br>( $\mu\text{m}$ ) |
|------------------------|--------------------------------------|----------------------------------------------|
| 1                      | 5.17                                 | 18.11                                        |
| 2                      | 7.27                                 | 14.34                                        |

|   |      |       |
|---|------|-------|
| 3 | 4.13 | 21.58 |
| 4 | 3.28 | 23.95 |
| 5 | 6.66 | 7.98  |

---

141

142 Data in the table show that the characteristic lengths of pore spaces are all larger than the grains. This  
143 is reasonable since the porosities of these five media are relatively high (Tab. 2 in the paper). Exp 5  
144 has the lowest porosity, and the two lengths are close. One may also use these pore spaces lengths to  
145 construct Peclet number, but the resulting values could be different.

146

#### 147 **8. Caption for supplemental video 1.**

148 This video records the retreat of the central CO<sub>2</sub> ganglia due to the expansion of the north and south  
149 wormholes. The video starts from Fig. 13(m) and stops at Fig. 13(p).

150

#### 151 **9. Caption for supplemental video 2.**

152 This video captures the escape of the trapped CO<sub>2</sub> gas ganglia from the north wormhole to the south's  
153 much wider wormhole in Exp 7S. Such gas redistribution causes a counterflow of CO<sub>2</sub> (opposite to  
154 the flow of acid) in the north wormhole.

155

#### 156 **10. Caption for supplemental video 3.**

157 This video captures the inflection of an advancing cone by dense particle zones in Exp 3S.2. The dense  
158 particle zone (which is harder to dissolve) causes the cone to change its direction of advancement. This  
159 shows that the impact of heterogeneity on channeling behaviors is significant. There is an active  
160 interplay between channeling and porous medium heterogeneity.

161

#### 162 **11. References**

163 1. Newman MEJ. Power laws, Pareto distributions and Zipf's law. *Contemporary Physics*. 2005;46(5):323-351.

164
